# Supplementary material
Source: PubMed Central journal article supplement (PMC3179055)
Supplement: 1100892108_pnas.201100892SI.pdf [file 1100892108_pnas.201100892SI.pdf]

# Supporting Information

Bault et al. 10.1073/pnas.1100892108

## SI Methods

**Theoretical Model of Choice.** We consider the value  $V$  when the subject chooses the act  $f$  and the alternative is  $g$  of the simple form (Eq. S1):

$$V(f, g) = \int_S u(f(s)) dP(s) + \int_S \gamma[u(f(s)) - u(g(s))] dP(s), \quad [\text{S1}]$$

where  $S$  is the state set (i.e., all of the possible outcomes),  $P$  is the subjective probability on it, and  $u$  is the utility function. The theory incorporates in its second component, described by the function  $\gamma$ , responses to the difference between the selected and unselected acts (i.e., a counterfactual comparison). If  $\gamma = 0$  (i.e., no counterfactual comparison), the subject just maximizes expected utility. The crucial property of the function  $\gamma$  is the relative weight of gains [ $u(f(s)) > u(g(s))$ ] and losses [ $u(g(s)) > u(f(s))$ ]. In the one-player trials, the act  $g$  is the act that the subject has not chosen. In the two-player trials,  $g$  is the act chosen by the other subject, and therefore,  $\gamma \neq 0$  implies social comparison. If social losses loom larger than gains, for any possible value ( $x$ ) of the difference between the expected outcomes of the selected and unselected acts,  $-\gamma(-x) > \gamma(x)$ , and equilibria are symmetric. Theory of interdependent utilities (1, 2) predicts the same behavior for the two participants; instead, if gains loom larger than losses,  $\gamma(x) > -\gamma(-x)$ , the equilibria are asymmetric, and the behavior of participants should be different from the behavior of their counterpart, seeking for differences in final incomes (i.e., social gains).

**Logit Model.** We estimate with the logit regression the probability of the participant choosing the first lottery as a function of the difference in expected value ( $dEV$ ) and SD ( $dSD$ ) between the first and second lottery (Eq. S2) is

$$\Pr(c = 1 | dEV, dSD) = \frac{\exp[\alpha + \beta(dEV) + \gamma(dSD)]}{1 + \exp[\alpha + \beta(dEV) + \gamma(dSD)]}. \quad [\text{S2}]$$

The variables  $dEV$  and  $dSD$  are defined as (Eqs. S3 and S4)

$$dEV = EV_1 - EV_2 = [px_1 + (1-p)y_1] - [qx_2 + (1-q)y_2] \text{ and} \quad [\text{S3}]$$

$$dSD = SD_1 - SD_2 = \sqrt{p(x_1 - EV_1)^2 + (1-p)(y_1 - EV_1)^2} - \sqrt{q(x_2 - EV_2)^2 + (1-q)(y_2 - EV_2)^2}, \quad [\text{S4}]$$

where  $x_1, y_1$  and  $x_2, y_2$  are the two possible outcomes of the first and the second lotteries, respectively, with  $x_1 > y_1$  and  $x_2 > y_2$ . The probability of  $x_1$  is  $p$ , and the probability of  $y_1$  is  $(1-p)$ . The probability of  $x_2$  is  $q$ , and the probability of  $y_2$  is  $(1-q)$ .

**Skin Conductance Recording.** Two MRI-compatible Ag/AgCl electrodes were placed on the subject's left hand after cleaning with neutral soap. A constant voltage of 0.5 V was applied between the electrodes. MR artifact was removed offline by median filtering. Data from eight subjects was removed because of acquisition problems or lack of measurable responses (less than 10% of the trials with detectable responses). For the 16 remaining subjects, we considered the event-specific skin conductance responses (SCRs) as occurring between 1 s after stimulus

onset and 0.5 s before the end of the event (3, 4). The SCR amplitude was thresholded at 0.02  $\mu\text{S}$ . SCR magnitude was calculated as the mean response amplitude computed across all trials, including those trials without a measurable response.

**Debriefing Questionnaires.** Debriefing questionnaires revealed that participants believed the outcomes of lotteries were random: they answered  $5.08 \pm 0.27$  on a scale from one (outcomes manipulated) to seven (outcomes random). They had the feeling that they were observing the choices of an actual human counterpart: they answered  $5.71 \pm 0.26$  on a scale from one (I did not feel that I was interacting with a real human being) to seven (I strongly felt that I was interacting with a real human being). Those participants who answered four (four subjects) or less (one subject) reported that the experimental setting (being in a different room and interacting through computers) made the interaction less salient. No participant reported any doubt about with whom they were playing.

Participants were not aware of their choice behavior being influenced by their counterpart: they answered  $2.79 \pm 0.38$  on a scale from one (not influenced at all) to seven (much influenced).

**Functional MRI Analysis. Images acquisition.** Functional MRI data were collected using a 1.5-Tesla MRI scanner (Magnetom Vision Plus; Siemens). Functional images were acquired using a gradient echo-planar imaging sequence (repetition time = 2.5 s; echo time = 50 ms) over three runs. Signal dropout in basal frontal and medial temporal structures because of susceptibility artifact was reduced by using a tilted plane of acquisition ( $30^\circ$  to the anterior commissure posterior commissure line, rostral > caudal) and performing z shimming in the slice selection direction. Partial brain coverage (some of the parietal cortex was not scanned) was obtained with 29 axial slices (thickness = 3.7 mm; gap = 0.47 mm; in-plane resolution =  $3.44 \times 3.44$  mm;  $64 \times 64$  matrix). Echo-planar images were coregistered to a high-resolution structural T1-weighted image obtained during the same session (176 sagittal slices; thickness = 1 mm;  $256 \times 256$  matrix). Head motions were minimized by the use of foam padding. Headphones were used to dampen the scanner noise.

**Images preprocessing.** Image preprocessing and subsequent analyses were performed using SPM5 (Wellcome Trust Centre for Neuroimaging) running on a Matlab platform. The first five functional volumes of each run were removed to allow for magnet stabilization. The remaining images were corrected for differences in slice acquisition time. Images were then realigned and unwarped to correct for motion artifacts. Unwarping was performed based on phase maps calculated using the Fieldmap SPM toolbox. For each participant, structural image was coregistered to the mean functional image. Structural data were normalized by matching them to the standardized Montreal Neurological Institute template, and the transformation parameters estimated in this step were applied to all functional images. Functional images were spatially smoothed with an 8-mm full width at one-half maximum Gaussian kernel before statistical analysis. High-resolution T1-weighted structural volumes from the 24 subjects were averaged together to permit anatomical localization of the functional activations at the group level.

**Beta Seed correlations.** Beta seed correlations analyses were performed using the methodology described by Rissman et al. (5). Separate covariates were used to model activity evoked during each stage (decision, button press, anticipatory, and outcome) of each individual trial. This first step was implemented in SPM5 in the context of a general linear model. The resulting parameter

estimates (beta values) were sorted according to the stage from which they derived from to form a set of decision-specific and a set of outcome-specific beta series. The two vectors of betas were shifted so that beta values deriving from the choice period ( $t$ ) were correlated with beta values deriving from the previous trial outcome evaluation ( $t - 1$ ). Correlation of the seed's beta series (averaged across the seed voxels) with the beta series of all other voxels in the brain was computed using Matlab 7.4 (<http://www.mathworks.com>), and seed correlation maps were generated. The correlation coefficients were then converted to  $z$  scores. Group-level random effects  $t$  tests were then conducted to identify voxels for which the mean of the individual subjects' transformed correlation coefficients was reliably greater than

zero. False discovery rate correction for multiple comparisons was applied using routines from SPM5. All statistical maps are displayed using MRIcron.

**Activations localization and reported statistics.** Anatomic labeling of activated regions was done both computationally with the SPM Anatomy toolbox (version 1.5; [http://www.fz-juelich.de/inm/inm-1/DE/Forschung/\\_docs/SPMAnatomyToolbox/SPMAnatomyToolbox\\_node.html](http://www.fz-juelich.de/inm/inm-1/DE/Forschung/_docs/SPMAnatomyToolbox/SPMAnatomyToolbox_node.html)) and visually by superposing the functional activations on a maximum probability atlas based on 30 subjects and containing 83 regions, based on ref. 6, in MRIcron (version 1.39, Build 4; <http://www.sph.sc.edu/comd/rorden/>).

- Maccheroni F, Marinacci M, Rustichini A (2011) Social decision theory: Choosing within and between groups. *Rev Econ Stud*, in press.
- Bault N, Coricelli G, Rustichini A (2008) Interdependent utilities: How social ranking affects choice behavior. *PLoS One* 3:e3477.
- Boucsein W (1992) *Electrodermal Activity* (University of Wuppertal, Wuppertal, Germany).
- Dawson ME, Schell AM, Filion DL (2000) The electrodermal system. *Handbook of Psychophysiology*, eds Cacioppo JT, Tassinari LG, Berntson G (Cambridge University Press, Cambridge, UK), pp 200–223.
- Rissman J, Gazzaley A, D'Esposito M (2004) Measuring functional connectivity during distinct stages of a cognitive task. *Neuroimage* 23:752–763.
- Hammers A, et al. (2003) Three-dimensional maximum probability atlas of the human brain, with particular reference to the temporal lobe. *Hum Brain Mapp* 19:224–247.

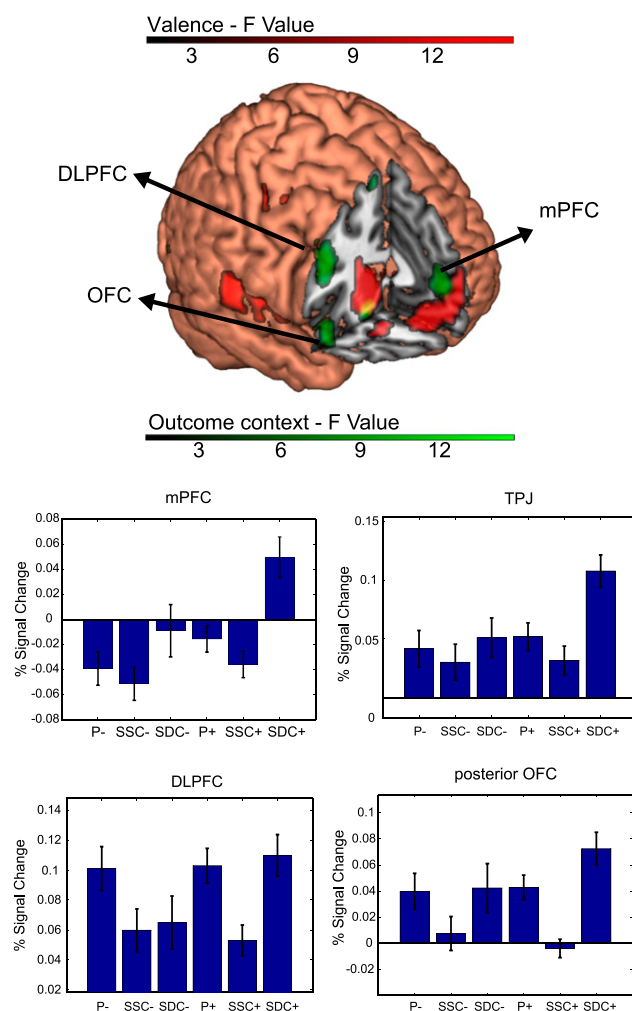

**Fig. S1.** Main effect of valence (red) and outcome context (green) during outcome evaluation.  $F$  maps projected on a canonical template brain. Red, activity related to valence (relative losses vs. relative gains) is found in the bilateral striatum (caudate and putamen) and the medial orbitofrontal cortex; green, activity within the medial prefrontal cortex, striatum, and lateral posterior orbitofrontal cortex discriminates between the three outcome conditions (private, social with same choices, and social with different choices) when the outcomes of the two lotteries are revealed. Group data (displayed at  $P = 0.0005$ , uncorrected) is overlaid on a 3D-rendered canonical template brain.

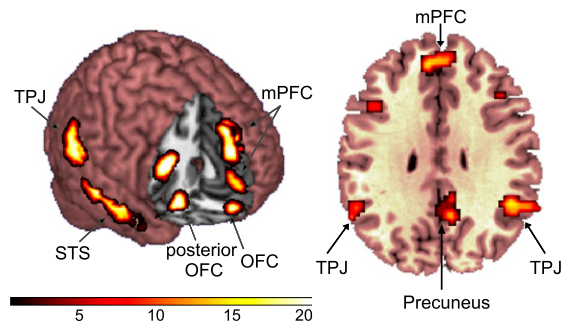

**Fig. S2.** Main effect of decision context during choice. *F* map projected on a canonical template brain (displayed at  $P = 0.05$ , corrected) for the main effect of decision context during the choice period. All regions (medial prefrontal cortex, orbitofrontal cortex, dorsolateral prefrontal cortex, superior temporal sulcus, precuneus/posterior cingulate cortex, and temporo-parietal junction) activated in this analysis were more activated in the social than the private condition).

**Table S1.** Panel logit regression for choice, the two groups, and the first 20 trials

| Variable name                                                 | Coefficient | SE    | z      | P      | 95% CI      |             |
|---------------------------------------------------------------|-------------|-------|--------|--------|-------------|-------------|
|                                                               |             |       |        |        | Lower value | Upper value |
| All subjects* ( $n = 24$ )                                    |             |       |        |        |             |             |
| <i>dEV</i>                                                    | 0.171       | 0.015 | 11.74  | <0.001 | 0.143       | 0.200       |
| <i>dSD</i>                                                    | 0.003       | 0.010 | 0.29   | 0.771  | -0.016      | 0.022       |
| Environment $\times$ <i>dEV</i>                               | 0.035       | 0.021 | 1.65   | 0.099  | -0.007      | 0.076       |
| Environment $\times$ <i>dSD</i>                               | 0.036       | 0.014 | 2.57   | 0.010  | 0.008       | 0.063       |
| Constant                                                      | -0.059      | 0.042 | -1.40  | 0.161  | -0.141      | 0.023       |
| Subjects in the prudent environment <sup>†</sup> ( $n = 12$ ) |             |       |        |        |             |             |
| <i>dEV</i>                                                    | 0.171       | 0.015 | 11.74  | <0.001 | 0.143       | 0.200       |
| <i>dSD</i>                                                    | 0.003       | 0.010 | 0.29   | 0.771  | -0.016      | 0.022       |
| Constant                                                      | -0.078      | 0.056 | -1.39  | 0.164  | -0.187      | 0.032       |
| Subjects in the bold environment <sup>‡</sup> ( $n = 12$ )    |             |       |        |        |             |             |
| <i>dEV</i>                                                    | 0.207       | 0.015 | 13.430 | <0.001 | 0.177       | 0.237       |
| <i>dSD</i>                                                    | 0.039       | 0.010 | 3.890  | <0.001 | 0.019       | 0.058       |
| Constant                                                      | -0.039      | 0.068 | -0.570 | 0.567  | -0.173      | 0.095       |
| All subjects <sup>§</sup> ( $n = 24$ ) first 20 trials        |             |       |        |        |             |             |
| <i>dEV</i>                                                    | 0.136       | 0.034 | 3.98   | <0.001 | 0.069       | 0.203       |
| <i>dSD</i>                                                    | 0.009       | 0.023 | 0.38   | 0.701  | -0.037      | 0.055       |
| Environment $\times$ <i>dEV</i>                               | 0.009       | 0.049 | 0.18   | 0.853  | -0.086      | 0.105       |
| Environment $\times$ <i>dSD</i>                               | -0.041      | 0.033 | -1.22  | 0.221  | -0.107      | 0.025       |
| Constant                                                      | -0.109      | 0.095 | -1.14  | 0.253  | -0.296      | 0.078       |

CI, confidence interval. Log likelihood = -311.67, Wald  $\chi^2$  (3) = 7.41, and probability  $> \chi^2 = 0.000$ .

\*Number of observations = 2,880. Log likelihood = -1,808.06, Wald  $\chi^2$  (3) = 322.03, and probability  $> \chi^2 = 0.000$ .

<sup>†</sup>Number of observations = 1,440. Log likelihood = -917.55, Wald  $\chi^2$  (3) = 141.31, and probability  $> \chi^2 = 0.000$ .

<sup>‡</sup>Number of observations = 1,440. Log likelihood = -890.02, Wald  $\chi^2$  (3) = 181.19, and probability  $> \chi^2 = 0.000$ .

<sup>§</sup>Number of observations = 480. Data from early trials ( $t < 20$ ).

**Table S2. Activated brain regions during the outcome period**

| Location                                                    | Side  | Voxels | F     | P (FDR corrected) | MNI coordinates |      |     |
|-------------------------------------------------------------|-------|--------|-------|-------------------|-----------------|------|-----|
|                                                             |       |        |       |                   | x               | y    | z   |
| <b>Main effect of valence</b>                               |       |        |       |                   |                 |      |     |
| Caudate and putamen                                         | Left  | 711    | 88    | <0.0001           | -12             | 9    | -9  |
| Caudate and putamen                                         | Right | 1,278  | 58.70 | <0.0001           | 21              | 15   | -3  |
| Precentral gyrus                                            | Right | 283    | 41.68 | <0.0001           | 42              | -12  | 51  |
| Orbitofrontal cortex                                        | —     | 278    | 26.70 | 0.0001            | 0               | 48   | -12 |
| Superior posterior temporal gyrus                           | Right | 34     | 26.65 | 0.0001            | 36              | -30  | -3  |
| Supplementary motor area                                    | —     | 130    | 26.64 | 0.0001            | 3               | -9   | 54  |
| Posterior temporal lobe                                     | Right | 54     | 25.78 | 0.0001            | 33              | -57  | -15 |
| Cerebellum                                                  | Left  | 265    | 23.97 | 0.0002            | -9              | -54  | -18 |
| Cerebellum                                                  | Right | 77     | 21.92 | 0.0004            | 24              | -84  | -18 |
| Angular gyrus                                               | Left  | 53     | 21.65 | 0.0004            | -39             | -66  | 36  |
| Cerebellum                                                  | Right | 72     | 21.56 | 0.0004            | 33              | -72  | -33 |
| Superior parietal gyrus and postcingulate                   | Left  | 376    | 21.51 | 0.0004            | -15             | -42  | 36  |
| Precentral gyrus                                            | Left  | 32     | 20.23 | 0.0007            | -24             | -24  | 57  |
| Thalamus incl.                                              | Left  | 19     | 20.09 | 0.0007            | -3              | -18  | 18  |
| Precentral gyrus                                            | Left  | 63     | 19.59 | 0.0008            | -39             | -15  | 39  |
| Precentral gyrus                                            | Left  | 91     | 19.56 | 0.0008            | -57             | 0    | 12  |
| Middle frontal gyrus                                        | Left  | 72     | 19.44 | 0.0009            | -27             | 12   | 42  |
| Middle occipital gyrus                                      | Left  | 14     | 18.80 | 0.0010            | -15             | -102 | 6   |
| Superior frontal gyrus                                      | Right | 13     | 18.77 | 0.0011            | 21              | 45   | 45  |
| Middle temporal gyrus                                       | Left  | 25     | 18.56 | 0.0011            | -57             | -45  | -3  |
| Anterior orbital gyrus                                      | Left  | 13     | 17.81 | 0.0014            | -24             | 36   | -9  |
| <b>Main effect of outcome context</b>                       |       |        |       |                   |                 |      |     |
| Caudate                                                     | Right | 40     | 14.88 | 0.0140            | 15              | 21   | -9  |
| Superior medial frontal gyrus                               | —     | 133    | 14.56 | 0.0140            | 0               | 54   | 9   |
| Inferior frontal gyrus, posterior orbital gyrus, and insula | Right | 124    | 14.45 | 0.0140            | 48              | 30   | -3  |
| Inferior/middle frontal gyrus                               | Right | 98     | 14.05 | 0.0140            | 45              | 21   | 30  |
| Superior parietal gyrus                                     | Right | 14     | 11.81 | 0.0167            | 24              | -45  | 24  |
| Middle central gyrus/precentral gyrus                       | Left  | 74     | 11.62 | 0.0171            | -33             | -3   | 45  |
| Superior parietal gyrus                                     | Left  | 11     | 10.60 | 0.0205            | -27             | -45  | 42  |
| Middle occipital gyrus                                      | Left  | 12     | 10.32 | 0.0226            | -30             | -78  | 27  |
| Angular gyrus/temporal sup                                  | Right | 25     | 10.07 | 0.0247            | 54              | -54  | 21  |
| Supramarginal gyrus                                         | Right | 14     | 9.91  | 0.0265            | 54              | -39  | 39  |
| Cerebellum                                                  | Left  | 14     | 9.84  | 0.0270            | -15             | -54  | -45 |
| Middle occipital gyrus                                      | Left  | 13     | 9.31  | 0.0298            | -33             | -78  | 9   |
| Middle occipital gyrus                                      | Right | 16     | 9.19  | 0.0313            | 42              | -75  | 9   |
| Angular gyrus                                               | Left  | 14     | 9.13  | 0.0317            | -45             | -60  | 27  |
| <b>Interaction between valence and outcome context</b>      |       |        |       |                   |                 |      |     |
| Ventral striatum                                            | Left  | 48     | 19.41 | 0.0009            | -9              | 9    | -3  |
| Supramarginal gyrus                                         | Right | 35     | 15.18 | 0.0037            | 57              | -45  | 33  |
| Ventral striatum                                            | Right | 32     | 14.46 | 0.0048            | 9               | 12   | -3  |
| Angular gyrus                                               | Right | 14     | 13.87 | 0.0066            | 45              | -48  | 24  |
| Cerebellum                                                  | Left  | 14     | 12.95 | 0.0089            | -36             | -72  | -51 |
| Superior frontal gyrus                                      | Right | 14     | 12.53 | 0.0106            | 18              | 42   | 36  |

MNI, Montreal Neurological Institute.

**Table S3. Main effect of decision context during the decision period**

| Location                                                   | Side  | Voxels | <i>F</i> | <i>P</i> (FDR corrected) | MNI coordinates |          |          |
|------------------------------------------------------------|-------|--------|----------|--------------------------|-----------------|----------|----------|
|                                                            |       |        |          |                          | <i>x</i>        | <i>y</i> | <i>z</i> |
| Lingual gyrus, calcarine, and inferior occipital           | Right | 871    | 66.65    | 0.0000                   | 12              | -87      | -3       |
| TPJ (sup temporal gyrus, mid temp, angular, supramarginal) | Right | 256    | 39.22    | 0.0001                   | 57              | -39      | 18       |
| Posterior orbital gyrus, insula                            | Right | 42     | 38.50    | 0.0001                   | 27              | 21       | -15      |
| Superior temporal sulcus (STS)                             | Right | 209    | 37.81    | 0.0001                   | 54              | -15      | -12      |
| Inferior frontal tri                                       | Right | 96     | 31.76    | 0.0003                   | 42              | 24       | 24       |
| TPJ (sup temporal gyrus, mid temp, angular, supramarginal) | Left  | 170    | 29.10    | 0.0005                   | -60             | -51      | 21       |
| Medial superior frontal                                    | —     | 151    | 28.74    | 0.0005                   | -3              | 42       | 39       |
| Medial orbital gyrus                                       | Right | 11     | 27.66    | 0.0007                   | 9               | 54       | -15      |
| Mid temporal gyrus                                         | Right | 39     | 27.03    | 0.0007                   | 48              | -54      | -3       |
| Precuneus                                                  | Right | 96     | 27.03    | 0.0007                   | 9               | -48      | 42       |
| Mid and posterior cingulate                                | Left  | 33     | 25.47    | 0.0010                   | -36             | 18       | -18      |
| Superior medial frontal gyrus, ACC                         | Right | 50     | 23.45    | 0.0014                   | 9               | 54       | 3        |
| Brainstem                                                  | —     | 18     | 20.14    | 0.0028                   | -9              | -27      | -6       |
| Superior temporal sulcus                                   | Left  | 11     | 18.24    | 0.0041                   | -63             | -6       | -21      |
| Superior medial frontal gyrus                              | Right | 11     | 18.09    | 0.0043                   | 12              | 36       | 57       |
| Superior temporal sulcus                                   | Left  | 13     | 18.07    | 0.0043                   | -57             | -27      | -6       |
| Inf frontal                                                | Left  | 17     | 17.36    | 0.0050                   | -42             | 15       | 30       |

FDR, false discovery rate.

**Table S4. Pairs of lotteries used in the experiment**

| Trial | Players | $p(x1)$ | $x1$ | $y1$ | Outcome of lottery 1 |     |    | Outcome of lottery 2 |     |      | dEV  | dSD | Bold counterpart's choices | Prudent counterpart's choices |
|-------|---------|---------|------|------|----------------------|-----|----|----------------------|-----|------|------|-----|----------------------------|-------------------------------|
| 1     | 1       | 0.2     | 20   | 5    | 20                   | 0.5 | 20 | -5                   | -5  | 0.5  | -6.5 | —   | —                          |                               |
| 2     | 1       | 0.5     | 20   | 5    | 5                    | 0.8 | 20 | -20                  | -20 | 0.5  | -8.5 | —   | —                          |                               |
| 3     | 1       | 0.2     | 20   | 5    | 5                    | 0.8 | 20 | -5                   | 20  | -7   | -4   | —   | —                          |                               |
| 4     | 1       | 0.2     | 5    | -20  | 5                    | 0.5 | -5 | -20                  | -20 | -2.5 | 2.5  | —   | —                          |                               |
| 5     | 2       | 0.5     | 5    | -20  | 5                    | 0.2 | 20 | -20                  | -20 | 4.5  | -3.5 | 1   | 1                          |                               |
| 6     | 2       | 0.8     | 20   | -20  | 20                   | 0.5 | 20 | -5                   | -5  | 4.5  | 3.5  | 1   | 2                          |                               |
| 7     | 2       | 0.5     | 5    | -20  | -20                  | 0.2 | 5  | -5                   | -5  | -4.5 | 8.5  | 2   | 2                          |                               |
| 8     | 2       | 0.8     | 20   | -5   | 20                   | 0.5 | 20 | 5                    | 5   | 2.5  | 2.5  | 1   | 2                          |                               |
| 9     | 2       | 0.8     | 20   | -5   | 20                   | 0.2 | 20 | 5                    | 5   | 7    | 4    | 1   | 2                          |                               |
| 10    | 1       | 0.2     | 20   | -20  | -20                  | 0.5 | 5  | -20                  | 5   | -4.5 | 3.5  | —   | —                          |                               |
| 11    | 2       | 0.5     | -5   | -20  | -5                   | 0.2 | 5  | -20                  | -20 | 2.5  | -2.5 | 1   | 2                          |                               |
| 12    | 2       | 0.5     | 20   | -5   | 20                   | 0.2 | 20 | 5                    | 5   | -0.5 | 6.5  | 2   | 2                          |                               |
| 13    | 1       | 0.2     | 5    | -20  | -20                  | 0.8 | -5 | -20                  | -5  | -7   | 4    | —   | —                          |                               |
| 14    | 1       | 0.5     | 20   | -5   | 20                   | 0.8 | 20 | -20                  | 20  | -4.5 | -3.5 | —   | —                          |                               |
| 15    | 1       | 0.2     | 20   | -20  | 20                   | 0.5 | -5 | -20                  | -20 | 0.5  | 8.5  | —   | —                          |                               |
| 16    | 1       | 0.2     | 5    | -5   | -5                   | 0.5 | 5  | -20                  | 5   | 4.5  | -8.5 | —   | —                          |                               |
| 17    | 1       | 0.5     | 20   | 5    | 5                    | 0.8 | 20 | -5                   | 20  | -2.5 | -2.5 | —   | —                          |                               |
| 18    | 1       | 0.5     | -5   | -20  | -20                  | 0.2 | 20 | -20                  | -20 | -0.5 | -8.5 | —   | —                          |                               |
| 19    | 1       | 0.8     | -5   | -20  | -5                   | 0.2 | 5  | -20                  | -20 | 7    | -4   | —   | —                          |                               |
| 20    | 2       | 0.8     | 20   | -20  | -20                  | 0.5 | 20 | 5                    | 20  | -0.5 | 8.5  | 2   | 2                          |                               |
| 21    | 2       | 0.5     | -5   | -20  | -5                   | 0.2 | 20 | -20                  | -20 | -0.5 | -8.5 | 2   | 1                          |                               |
| 22    | 2       | 0.8     | -5   | -20  | -5                   | 0.2 | 5  | -20                  | -20 | 7    | -4   | 1   | 1                          |                               |
| 23    | 2       | 0.5     | 20   | 5    | 5                    | 0.8 | 20 | -20                  | -20 | 0.5  | -8.5 | 1   | 1                          |                               |
| 24    | 1       | 0.8     | 20   | -20  | 20                   | 0.5 | 20 | -5                   | -5  | 4.5  | 3.5  | —   | —                          |                               |
| 25    | 2       | 0.2     | 20   | 5    | 5                    | 0.8 | 20 | -5                   | 20  | -7   | -4   | 2   | 1                          |                               |
| 26    | 2       | 0.2     | 20   | -20  | 20                   | 0.5 | -5 | -20                  | -20 | 0.5  | 8.5  | 1   | 2                          |                               |
| 27    | 2       | 0.2     | 20   | -20  | -20                  | 0.5 | 5  | -20                  | 5   | -4.5 | 3.5  | 2   | 2                          |                               |
| 28    | 1       | 0.5     | 5    | -20  | -20                  | 0.2 | 5  | -5                   | -5  | -4.5 | 8.5  | —   | —                          |                               |
| 29    | 2       | 0.2     | 5    | -20  | -20                  | 0.8 | -5 | -20                  | -5  | -7   | 4    | 1   | 2                          |                               |
| 30    | 1       | 0.8     | 20   | -5   | 20                   | 0.2 | 20 | 5                    | 5   | 7    | 4    | —   | —                          |                               |
| 31    | 2       | 0.2     | 20   | 5    | 5                    | 0.5 | 20 | -5                   | 20  | 0.5  | -6.5 | 1   | 2                          |                               |
| 32    | 1       | 0.5     | -5   | -20  | -5                   | 0.2 | 5  | -20                  | -20 | 2.5  | -2.5 | —   | —                          |                               |
| 33    | 1       | 0.8     | 20   | -5   | -5                   | 0.5 | 20 | 5                    | 20  | 2.5  | 2.5  | —   | —                          |                               |
| 34    | 2       | 0.5     | 20   | -5   | -5                   | 0.8 | 20 | -20                  | 20  | -4.5 | -3.5 | 2   | 1                          |                               |
| 35    | 2       | 0.5     | 20   | 5    | 20                   | 0.8 | 20 | -5                   | 20  | -2.5 | -2.5 | 2   | 1                          |                               |
| 36    | 2       | 0.2     | 5    | -5   | -5                   | 0.5 | 5  | -20                  | -20 | 4.5  | -8.5 | 1   | 1                          |                               |
| 37    | 1       | 0.5     | 5    | -20  | -20                  | 0.2 | 20 | -20                  | 20  | 4.5  | -3.5 | —   | —                          |                               |
| 38    | 1       | 0.5     | 20   | -5   | -5                   | 0.2 | 20 | 5                    | 20  | -0.5 | 6.5  | —   | —                          |                               |
| 39    | 1       | 0.8     | 20   | -20  | -20                  | 0.5 | 20 | 5                    | 5   | -0.5 | 8.5  | —   | —                          |                               |
| 40    | 2       | 0.2     | 5    | -20  | -20                  | 0.5 | -5 | -20                  | -5  | -2.5 | 2.5  | 2   | 2                          |                               |
| 41    | 1       | 0.2     | 5    | -5   | -5                   | 0.5 | 5  | -20                  | 5   | 4.5  | -8.5 | —   | —                          |                               |
| 42    | 2       | 0.8     | -5   | -20  | -5                   | 0.2 | 5  | -20                  | -20 | 7    | -4   | 1   | 1                          |                               |
| 43    | 2       | 0.8     | 20   | -5   | 20                   | 0.5 | 20 | 5                    | 5   | 2.5  | 2.5  | 1   | 2                          |                               |
| 44    | 2       | 0.8     | 20   | -5   | 20                   | 0.2 | 20 | 5                    | 5   | 7    | 4    | 2   | 1                          |                               |
| 45    | 2       | 0.5     | 20   | -5   | 20                   | 0.2 | 20 | 5                    | 5   | -0.5 | 6.5  | 2   | 2                          |                               |
| 46    | 1       | 0.5     | 20   | 5    | 20                   | 0.8 | 20 | -20                  | -20 | 0.5  | -8.5 | —   | —                          |                               |
| 47    | 2       | 0.8     | 20   | -20  | 20                   | 0.5 | 20 | -5                   | -5  | 4.5  | 3.5  | 1   | 2                          |                               |
| 48    | 1       | 0.2     | 20   | 5    | 5                    | 0.5 | 20 | -5                   | 20  | 0.5  | -6.5 | —   | —                          |                               |
| 49    | 1       | 0.5     | 20   | -5   | -5                   | 0.8 | 20 | -20                  | 20  | -4.5 | -3.5 | —   | —                          |                               |
| 50    | 2       | 0.8     | 20   | -20  | 20                   | 0.5 | 20 | 5                    | 5   | -0.5 | 8.5  | 2   | 2                          |                               |
| 51    | 2       | 0.5     | 5    | -20  | 5                    | 0.2 | 20 | -20                  | -20 | 4.5  | -3.5 | 1   | 1                          |                               |
| 52    | 2       | 0.5     | -5   | -20  | -20                  | 0.2 | 20 | -20                  | 20  | -0.5 | -8.5 | 2   | 1                          |                               |
| 53    | 1       | 0.5     | 20   | 5    | 20                   | 0.8 | 20 | -5                   | -5  | -2.5 | -2.5 | —   | —                          |                               |
| 54    | 2       | 0.5     | 5    | -20  | 5                    | 0.2 | 5  | -5                   | -5  | -4.5 | 8.5  | 2   | 2                          |                               |
| 55    | 1       | 0.2     | 5    | -20  | -20                  | 0.8 | -5 | -20                  | -5  | -7   | 4    | —   | —                          |                               |
| 56    | 2       | 0.5     | -5   | -20  | -20                  | 0.2 | 5  | -20                  | 5   | 2.5  | -2.5 | 1   | 1                          |                               |
| 57    | 2       | 0.2     | 20   | -20  | -20                  | 0.5 | -5 | -20                  | -20 | 0.5  | 8.5  | 1   | 2                          |                               |
| 58    | 1       | 0.2     | 20   | 5    | 5                    | 0.8 | 20 | -5                   | 20  | -7   | -4   | —   | —                          |                               |
| 59    | 2       | 0.2     | 5    | -20  | -20                  | 0.5 | -5 | -20                  | -5  | -2.5 | 2.5  | 2   | 1                          |                               |
| 60    | 1       | 0.2     | 20   | -20  | -20                  | 0.5 | 5  | -20                  | 5   | -4.5 | 3.5  | —   | —                          |                               |
| 61    | 1       | 0.2     | 5    | -20  | -20                  | 0.5 | -5 | -20                  | -20 | -2.5 | 2.5  | —   | —                          |                               |
| 62    | 1       | 0.2     | 20   | -20  | -20                  | 0.5 | -5 | -20                  | -5  | 0.5  | 8.5  | —   | —                          |                               |

Table S4. Cont.

| Trial | Players | $p(x1)$ | $x1$ | $y1$ | Outcome of<br>lottery 1 | $p(x2)$ | $x2$ | $y2$ | Outcome of<br>lottery 2 | dEV  | dSD  | Bold counterpart's<br>choices | Prudent counterpart's<br>choices |
|-------|---------|---------|------|------|-------------------------|---------|------|------|-------------------------|------|------|-------------------------------|----------------------------------|
| 63    | 2       | 0.5     | 20   | 5    | 20                      | 0.8     | 20   | -20  | -20                     | 0.5  | -8.5 | 1                             | 1                                |
| 64    | 1       | 0.8     | 20   | -5   | 20                      | 0.2     | 20   | 5    | 5                       | 7    | 4    | —                             | —                                |
| 65    | 1       | 0.5     | -5   | -20  | -20                     | 0.2     | 20   | -20  | 20                      | -0.5 | -8.5 | —                             | —                                |
| 66    | 1       | 0.8     | 20   | -20  | 20                      | 0.5     | 20   | -5   | -5                      | 4.5  | 3.5  | —                             | —                                |
| 67    | 2       | 0.2     | 20   | 5    | 20                      | 0.5     | 20   | -5   | -5                      | 0.5  | -6.5 | 1                             | 1                                |
| 68    | 1       | 0.8     | -5   | -20  | -5                      | 0.2     | 5    | -20  | -20                     | 7    | -4   | —                             | —                                |
| 69    | 2       | 0.2     | 20   | 5    | 5                       | 0.8     | 20   | -5   | 20                      | -7   | -4   | 2                             | 1                                |
| 70    | 2       | 0.2     | 20   | -20  | 20                      | 0.5     | 5    | -20  | -20                     | -4.5 | 3.5  | 1                             | 2                                |
| 71    | 1       | 0.5     | 5    | -20  | 5                       | 0.2     | 20   | -20  | -20                     | 4.5  | -3.5 | —                             | —                                |
| 72    | 1       | 0.5     | -5   | -20  | -5                      | 0.2     | 5    | -20  | -20                     | 2.5  | -2.5 | —                             | —                                |
| 73    | 1       | 0.5     | 5    | -20  | -20                     | 0.2     | 5    | -5   | -5                      | -4.5 | 8.5  | —                             | —                                |
| 74    | 1       | 0.8     | 20   | -20  | -20                     | 0.5     | 20   | 5    | 20                      | -0.5 | 8.5  | —                             | —                                |
| 75    | 2       | 0.5     | 20   | 5    | 5                       | 0.8     | 20   | -5   | 20                      | -2.5 | -2.5 | 2                             | 1                                |
| 76    | 1       | 0.5     | 20   | -5   | 20                      | 0.2     | 20   | 5    | 5                       | -0.5 | 6.5  | —                             | —                                |
| 77    | 2       | 0.2     | 5    | -5   | 5                       | 0.5     | 5    | -20  | -20                     | 4.5  | -8.5 | 2                             | 1                                |
| 78    | 1       | 0.8     | 20   | -5   | 20                      | 0.5     | 20   | 5    | 20                      | 2.5  | 2.5  | —                             | —                                |
| 79    | 2       | 0.2     | 5    | -20  | -20                     | 0.8     | -5   | -20  | -5                      | -7   | 4    | 2                             | 2                                |
| 80    | 2       | 0.5     | 20   | -5   | -5                      | 0.8     | 20   | -20  | 20                      | -4.5 | -3.5 | 2                             | 1                                |
| 81    | 2       | 0.5     | 5    | -20  | 5                       | 0.2     | 20   | -20  | -20                     | 4.5  | -3.5 | 1                             | 1                                |
| 82    | 2       | 0.5     | -5   | -20  | -20                     | 0.2     | 5    | -20  | -20                     | 2.5  | -2.5 | 1                             | 1                                |
| 83    | 2       | 0.5     | -5   | -20  | -20                     | 0.2     | 20   | -20  | 20                      | -0.5 | -8.5 | 2                             | 1                                |
| 84    | 1       | 0.5     | 20   | 5    | 5                       | 0.8     | 20   | -20  | 20                      | 0.5  | -8.5 | —                             | —                                |
| 85    | 1       | 0.2     | 5    | -20  | -20                     | 0.8     | -5   | -20  | -5                      | -7   | 4    | —                             | —                                |
| 86    | 1       | 0.2     | 5    | -5   | -5                      | 0.5     | 5    | -20  | -20                     | 4.5  | -8.5 | —                             | —                                |
| 87    | 2       | 0.5     | 5    | -20  | 5                       | 0.2     | 5    | -5   | -5                      | -4.5 | 8.5  | 2                             | 2                                |
| 88    | 1       | 0.2     | 20   | -20  | -20                     | 0.5     | 5    | -20  | 5                       | -4.5 | 3.5  | —                             | —                                |
| 89    | 2       | 0.8     | -5   | -20  | -5                      | 0.2     | 5    | -20  | -20                     | 7    | -4   | 1                             | 1                                |
| 90    | 1       | 0.2     | 20   | 5    | 5                       | 0.8     | 20   | -5   | 20                      | -7   | -4   | —                             | —                                |
| 91    | 2       | 0.8     | 20   | -5   | 20                      | 0.2     | 20   | 5    | 5                       | 7    | 4    | 1                             | 2                                |
| 92    | 1       | 0.2     | 20   | 5    | 5                       | 0.5     | 20   | -5   | 20                      | 0.5  | -6.5 | —                             | —                                |
| 93    | 1       | 0.5     | 20   | -5   | -5                      | 0.8     | 20   | -20  | 20                      | -4.5 | -3.5 | —                             | —                                |
| 94    | 2       | 0.8     | 20   | -20  | -20                     | 0.5     | 20   | 5    | 5                       | -0.5 | 8.5  | 2                             | 2                                |
| 95    | 2       | 0.8     | 20   | -20  | 20                      | 0.5     | 20   | -5   | 20                      | 4.5  | 3.5  | 1                             | 1                                |
| 96    | 2       | 0.5     | 20   | -5   | -5                      | 0.2     | 20   | 5    | 20                      | -0.5 | 6.5  | 1                             | 1                                |
| 97    | 1       | 0.2     | 5    | -20  | -20                     | 0.5     | -5   | -20  | -5                      | -2.5 | 2.5  | —                             | —                                |
| 98    | 1       | 0.2     | 20   | -20  | 20                      | 0.5     | -5   | -20  | -20                     | 0.5  | 8.5  | —                             | —                                |
| 99    | 1       | 0.5     | 20   | 5    | 5                       | 0.8     | 20   | -5   | 20                      | -2.5 | -2.5 | —                             | —                                |
| 100   | 2       | 0.8     | 20   | -5   | -5                      | 0.5     | 20   | 5    | 20                      | 2.5  | 2.5  | 1                             | 2                                |
| 101   | 2       | 0.5     | 20   | -5   | -5                      | 0.8     | 20   | -20  | 20                      | -4.5 | -3.5 | 2                             | 1                                |
| 102   | 1       | 0.8     | 20   | -5   | 20                      | 0.5     | 20   | 5    | 5                       | 2.5  | 2.5  | —                             | —                                |
| 103   | 2       | 0.2     | 20   | -20  | -20                     | 0.5     | -5   | -20  | -5                      | 0.5  | 8.5  | 1                             | 2                                |
| 104   | 2       | 0.2     | 5    | -5   | -5                      | 0.5     | 5    | -20  | -20                     | 4.5  | -8.5 | 1                             | 1                                |
| 105   | 1       | 0.8     | -5   | -20  | -5                      | 0.2     | 5    | -20  | -20                     | 7    | -4   | —                             | —                                |
| 106   | 1       | 0.8     | 20   | -20  | 20                      | 0.5     | 20   | -5   | -5                      | 4.5  | 3.5  | —                             | —                                |
| 107   | 2       | 0.2     | 20   | 5    | 5                       | 0.8     | 20   | -5   | 20                      | -7   | -4   | 2                             | 1                                |
| 108   | 2       | 0.5     | 20   | 5    | 20                      | 0.8     | 20   | -5   | -5                      | -2.5 | -2.5 | 2                             | 1                                |
| 109   | 1       | 0.5     | 5    | -20  | -20                     | 0.2     | 5    | -5   | 5                       | -4.5 | 8.5  | —                             | —                                |
| 110   | 2       | 0.2     | 20   | -20  | -20                     | 0.5     | 5    | -20  | 5                       | -4.5 | 3.5  | 2                             | 2                                |
| 111   | 2       | 0.2     | 20   | 5    | 5                       | 0.5     | 20   | -5   | 20                      | 0.5  | -6.5 | 1                             | 1                                |
| 112   | 2       | 0.2     | 5    | -20  | -20                     | 0.8     | -5   | -20  | -5                      | -7   | 4    | 2                             | 2                                |
| 113   | 2       | 0.5     | 20   | 5    | 20                      | 0.8     | 20   | -20  | -20                     | 0.5  | -8.5 | 2                             | 1                                |
| 114   | 1       | 0.5     | 5    | -20  | 5                       | 0.2     | 20   | -20  | -20                     | 4.5  | -3.5 | —                             | —                                |
| 115   | 1       | 0.5     | -5   | -20  | -5                      | 0.2     | 5    | -20  | -20                     | 2.5  | -2.5 | —                             | —                                |
| 116   | 1       | 0.8     | 20   | -20  | -20                     | 0.5     | 20   | 5    | 20                      | -0.5 | 8.5  | —                             | —                                |
| 117   | 2       | 0.2     | 5    | -20  | -20                     | 0.5     | -5   | -20  | -5                      | -2.5 | 2.5  | 2                             | 2                                |
| 118   | 1       | 0.8     | 20   | -5   | 20                      | 0.2     | 20   | 5    | 5                       | 7    | 4    | —                             | —                                |
| 119   | 1       | 0.5     | -5   | -20  | -5                      | 0.2     | 20   | -20  | -20                     | -0.5 | -8.5 | —                             | —                                |
| 120   | 1       | 0.5     | 20   | -5   | 20                      | 0.2     | 20   | 5    | 5                       | -0.5 | 6.5  | —                             | —                                |

The column Players is equal to one for a private trial and two for a social trial.  $x1$  and  $y1$  are the two possible outcomes of lottery 1.  $p(x1)$  is the probability of  $x1$  [ $p(y1) = 1 - p(x1)$ ].  $x2$  and  $y2$  are the two possible outcomes of lottery 2.  $p(x2)$  is the probability of  $x2$ . dEV is the difference between the expected values of lotteries 1 and 2. dSD is the difference in SD (risk) between the two lotteries.
